# Supplementary material
Source: PubMed Central journal article supplement (PMC5072533)

**Fig S1. synNotch Receptors Drive Antigen-dependent Custom Gene Regulation in Primary Human T cells (related to main text Figure 1).**

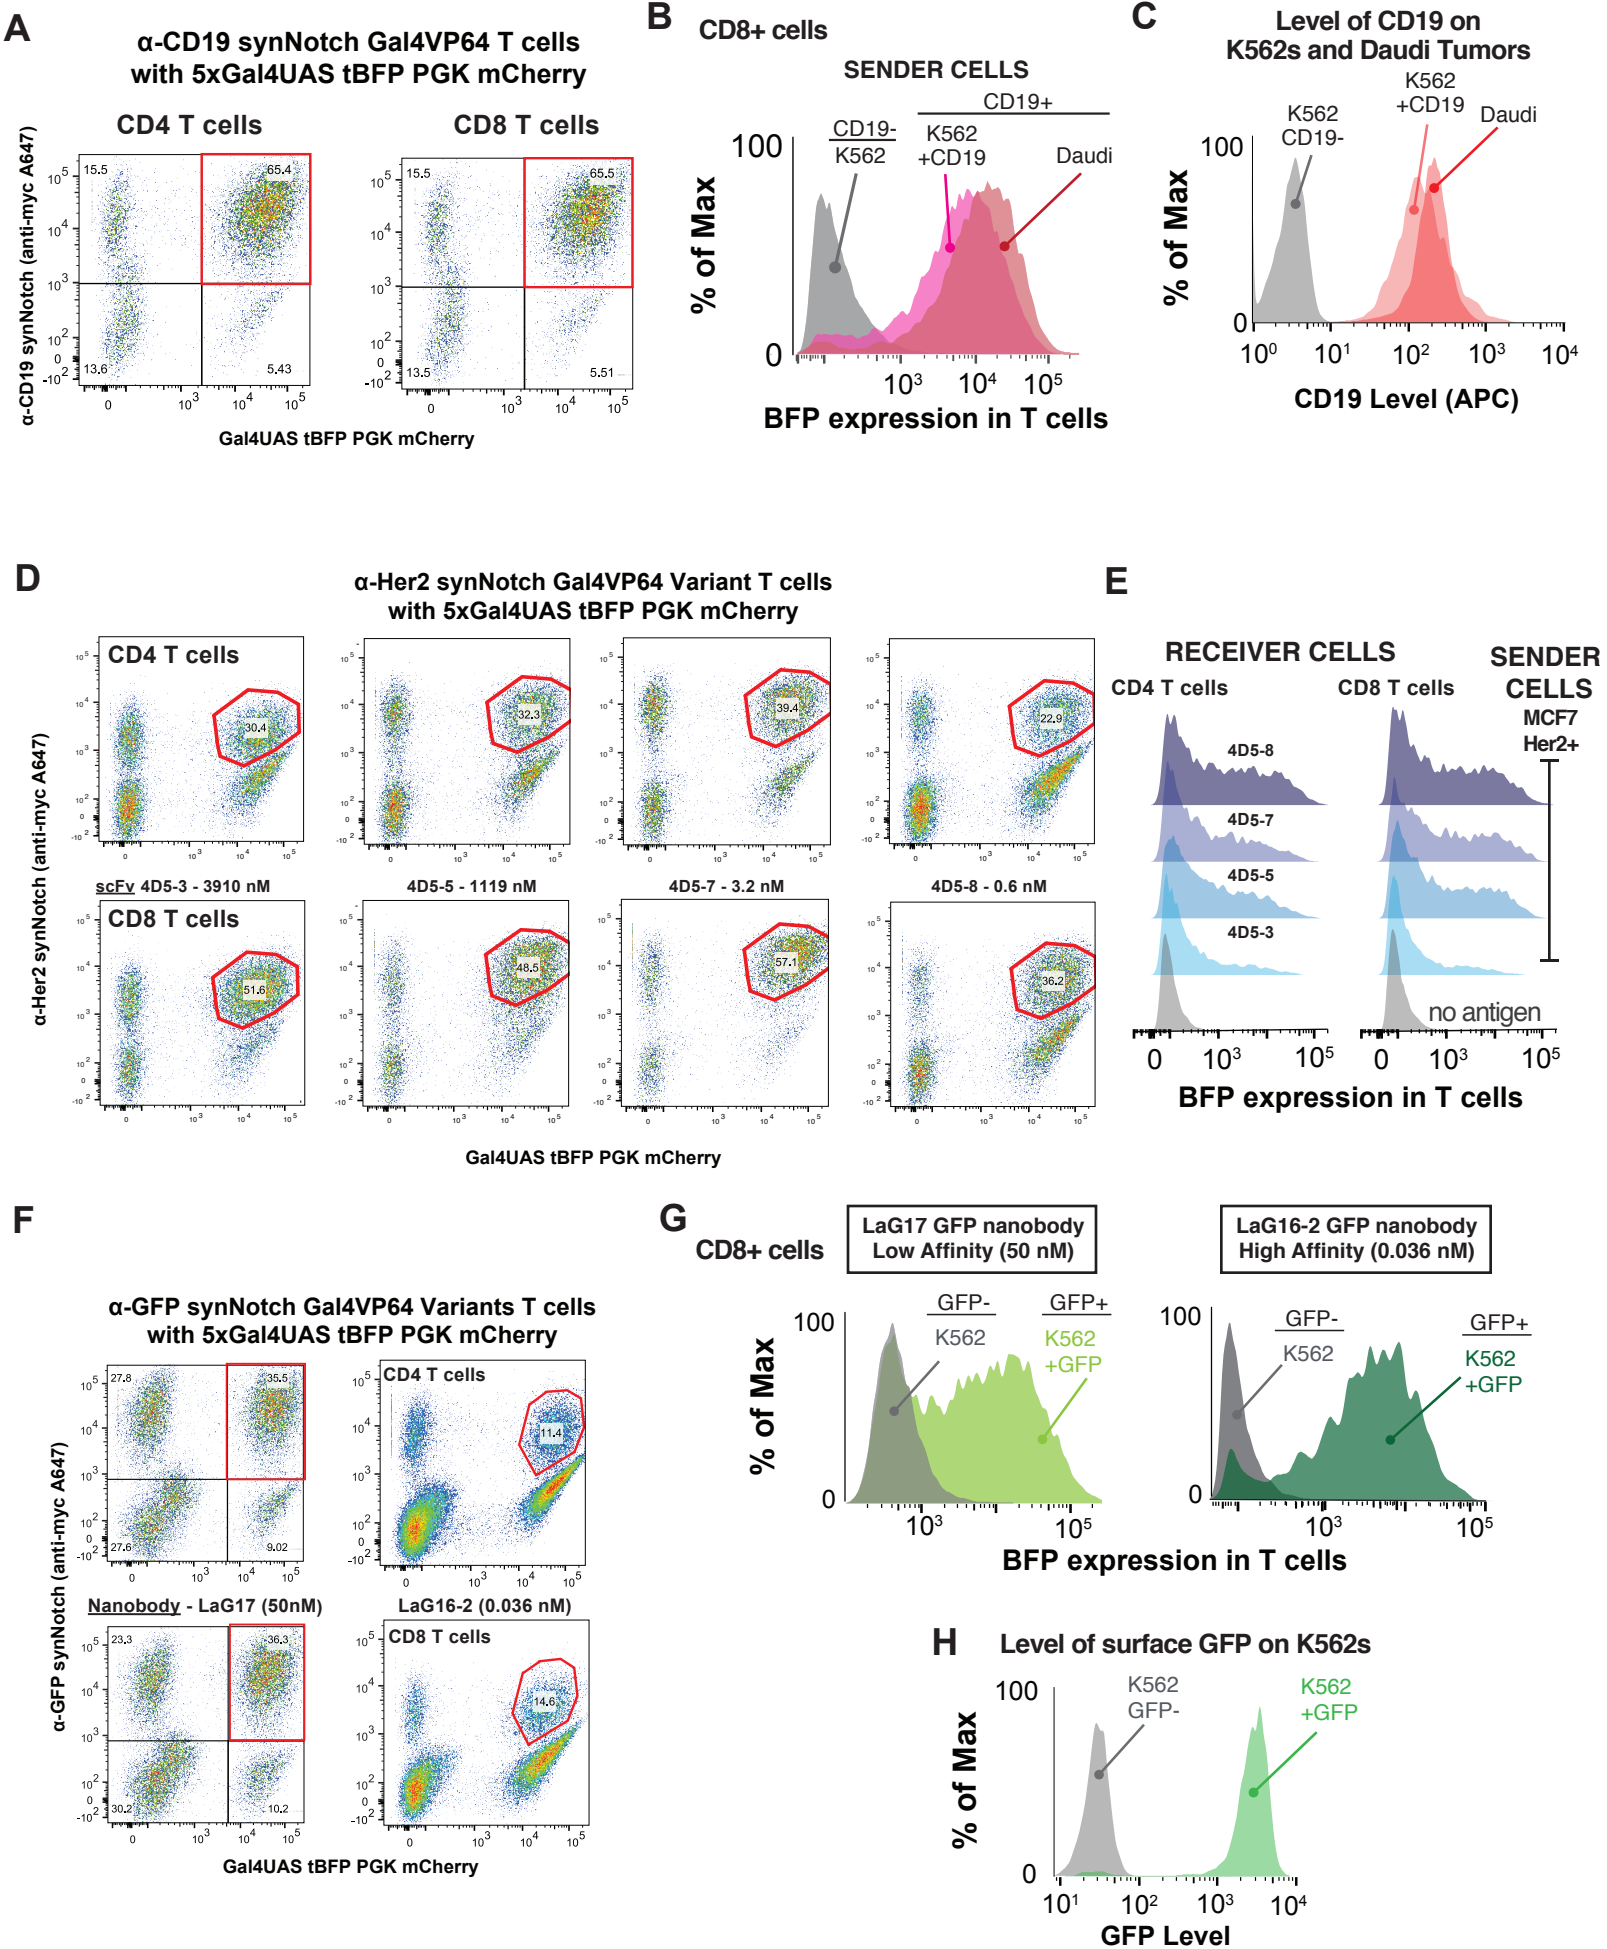

Supplement: NIHMS820006-supplement-2.pdf [file NIHMS820006-supplement-2.pdf]
