# Supplementary material
Source: PubMed Central journal article supplement (PMC5072533)

**Fig S4. synNotch Receptor Circuits Can be Used to Engineer Customized Killer T cells (related to main text Figure 4).**

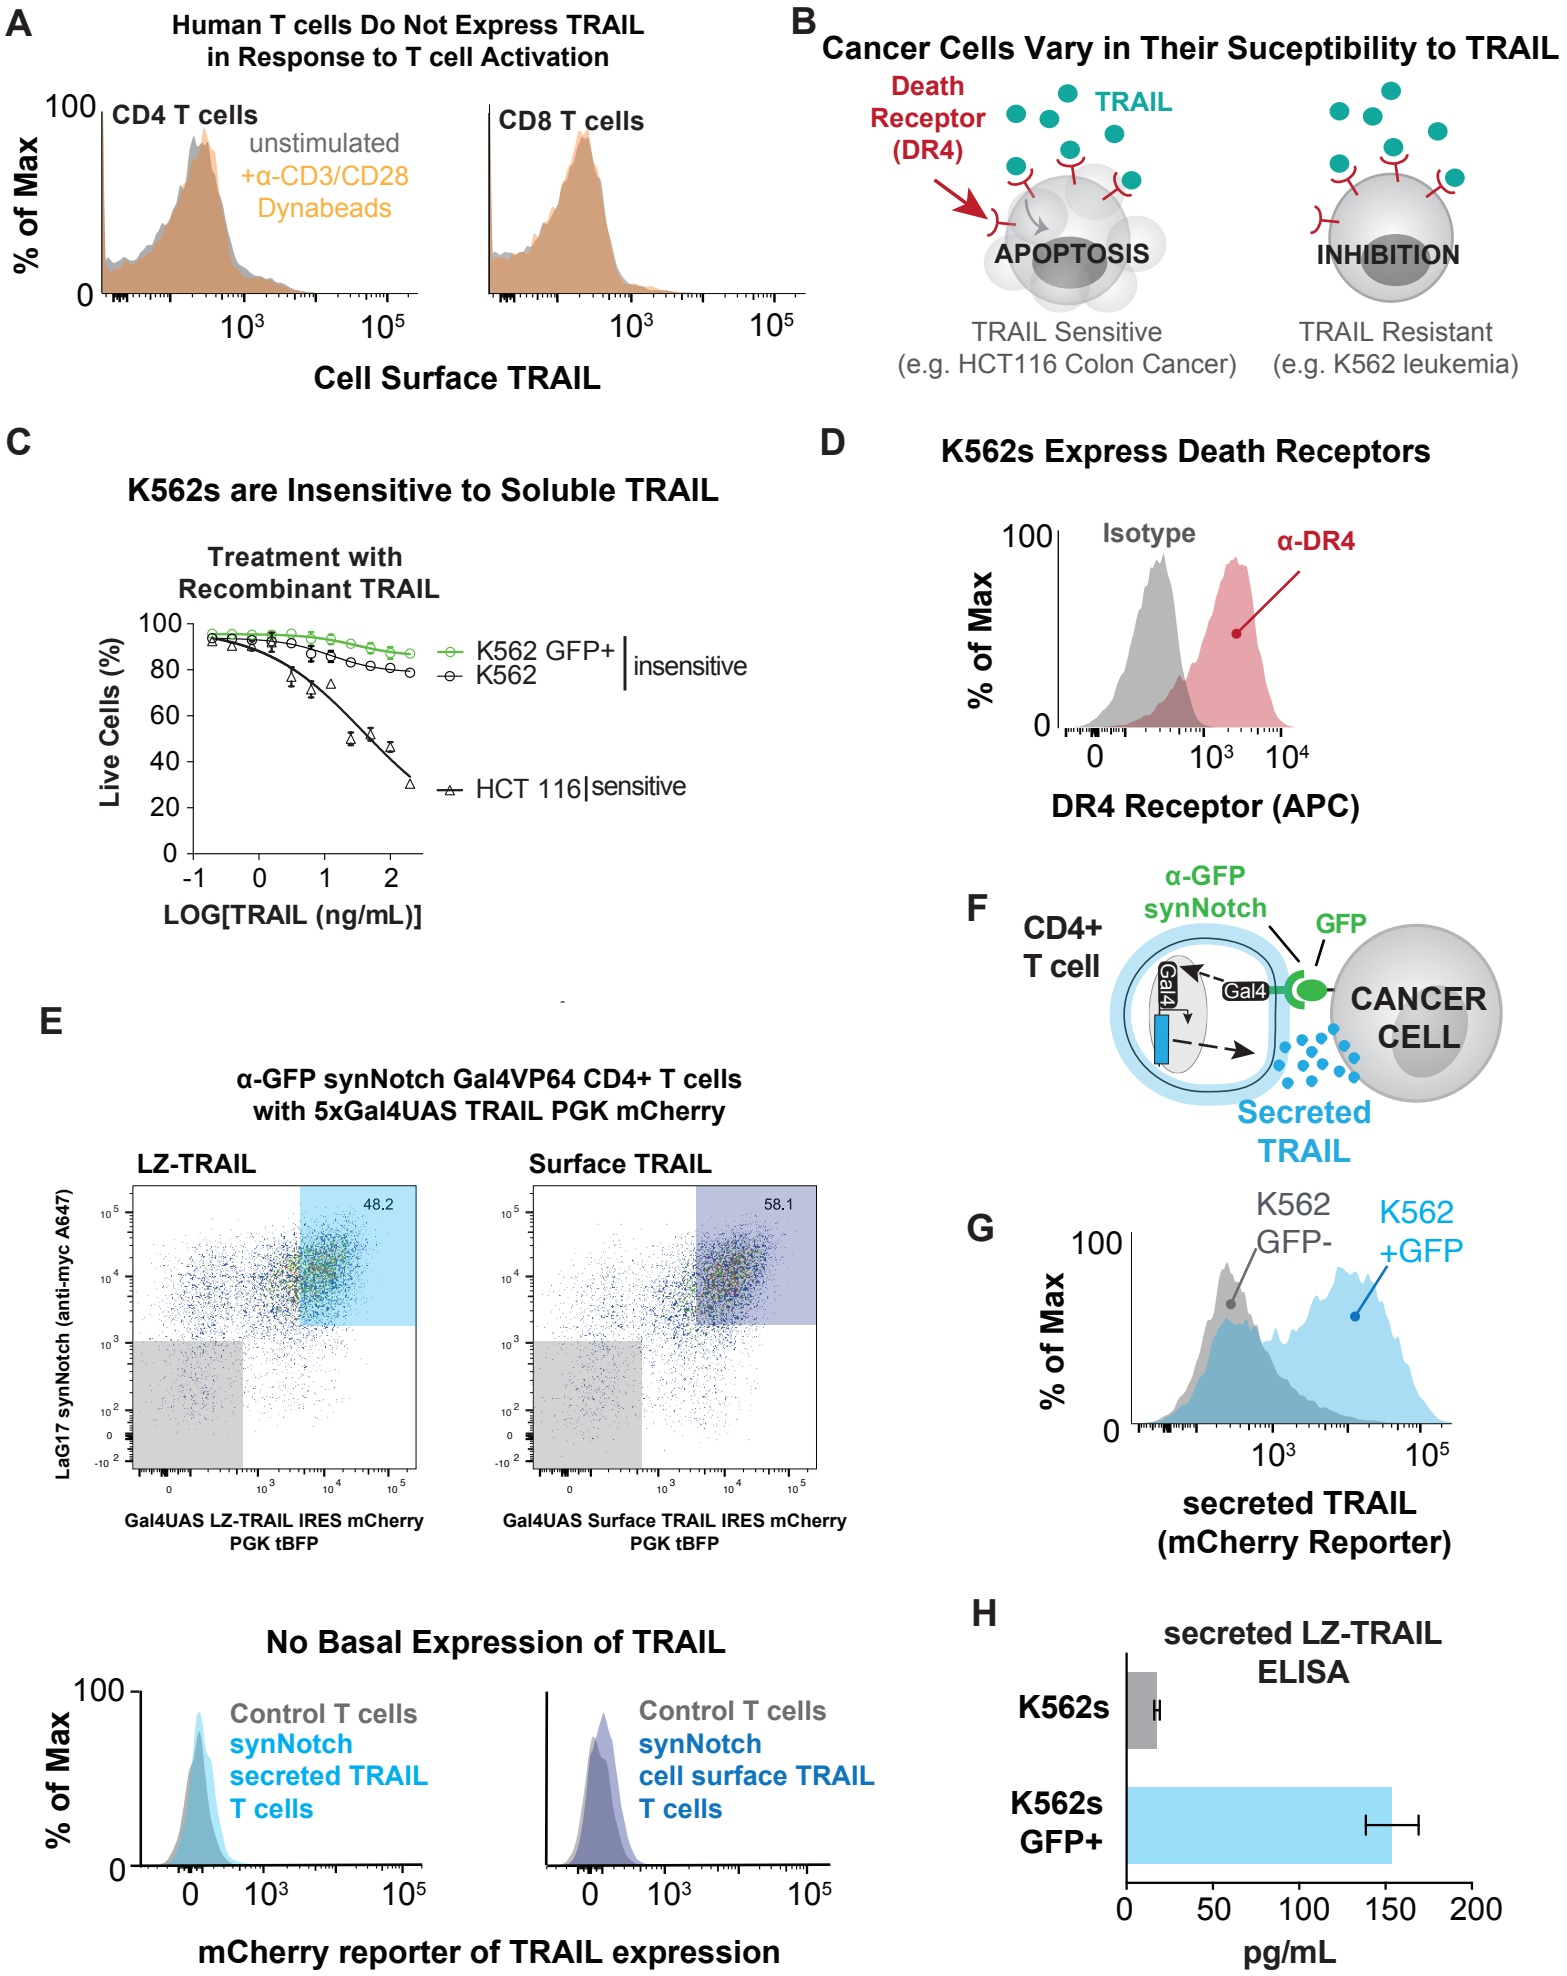

Supplement: NIHMS820006-supplement-5.pdf [file NIHMS820006-supplement-5.pdf]
