# Supplementary material
Source: PubMed Central journal article supplement (PMC5072533)

**Fig S5. synNotch Receptor Circuits for Antigen-dependent Production of Antibodies, Adjuvants, and Immune Suppressive Agents (related to main text Figure 5).**

**A**

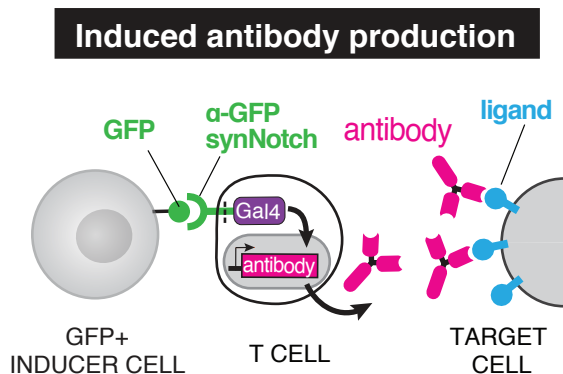

**Secretion of Single Therapeutic Antibodies**

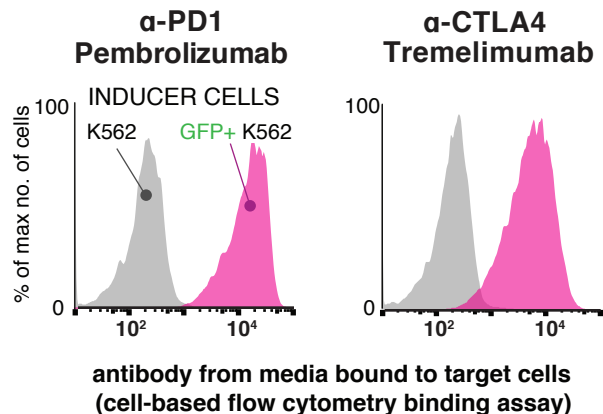

**B**

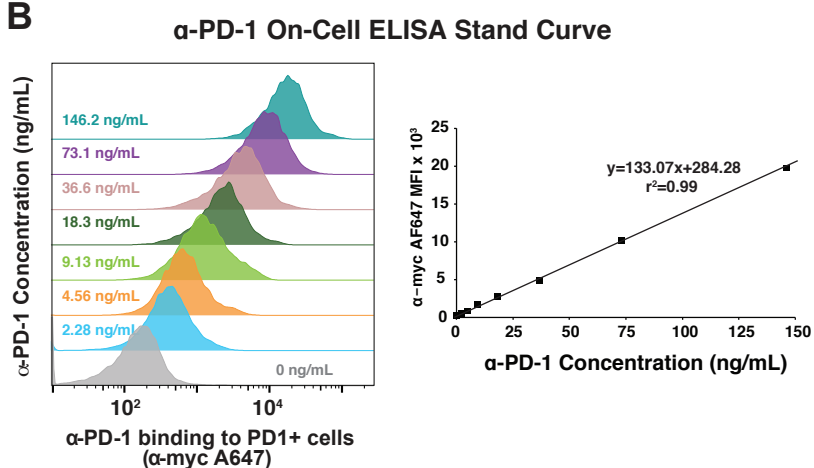

**C**

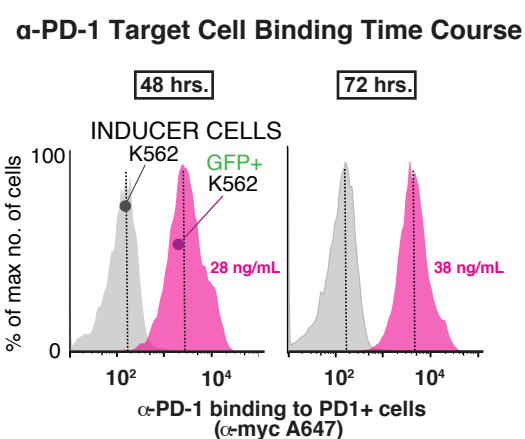

**D**

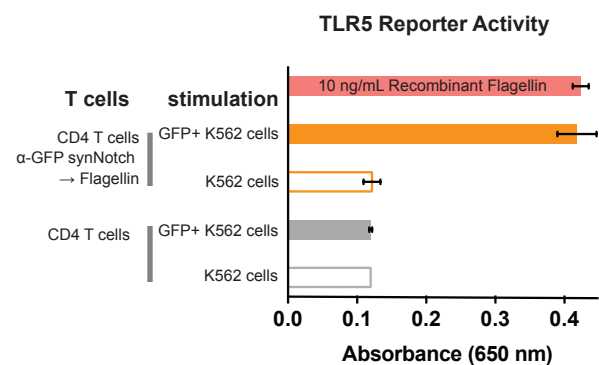

**E**

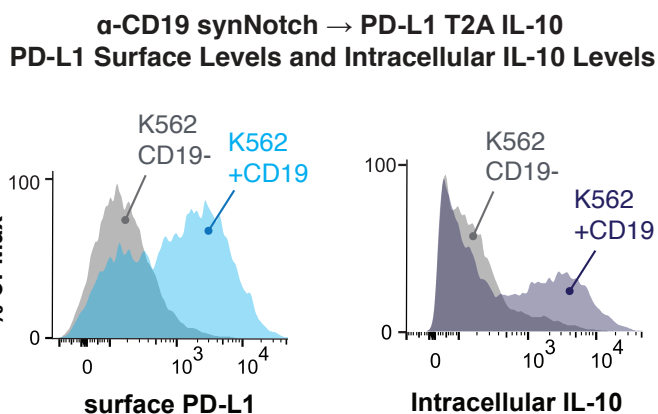

Supplement: NIHMS820006-supplement-6.pdf [file NIHMS820006-supplement-6.pdf]
