# Supplementary material
Source: PubMed Central journal article supplement (PMC5072533)

**Fig S6. synNotch Receptor T cells Locally Produce Cytokines and Therapeutic Agents in vivo (related to main text figure 6).**

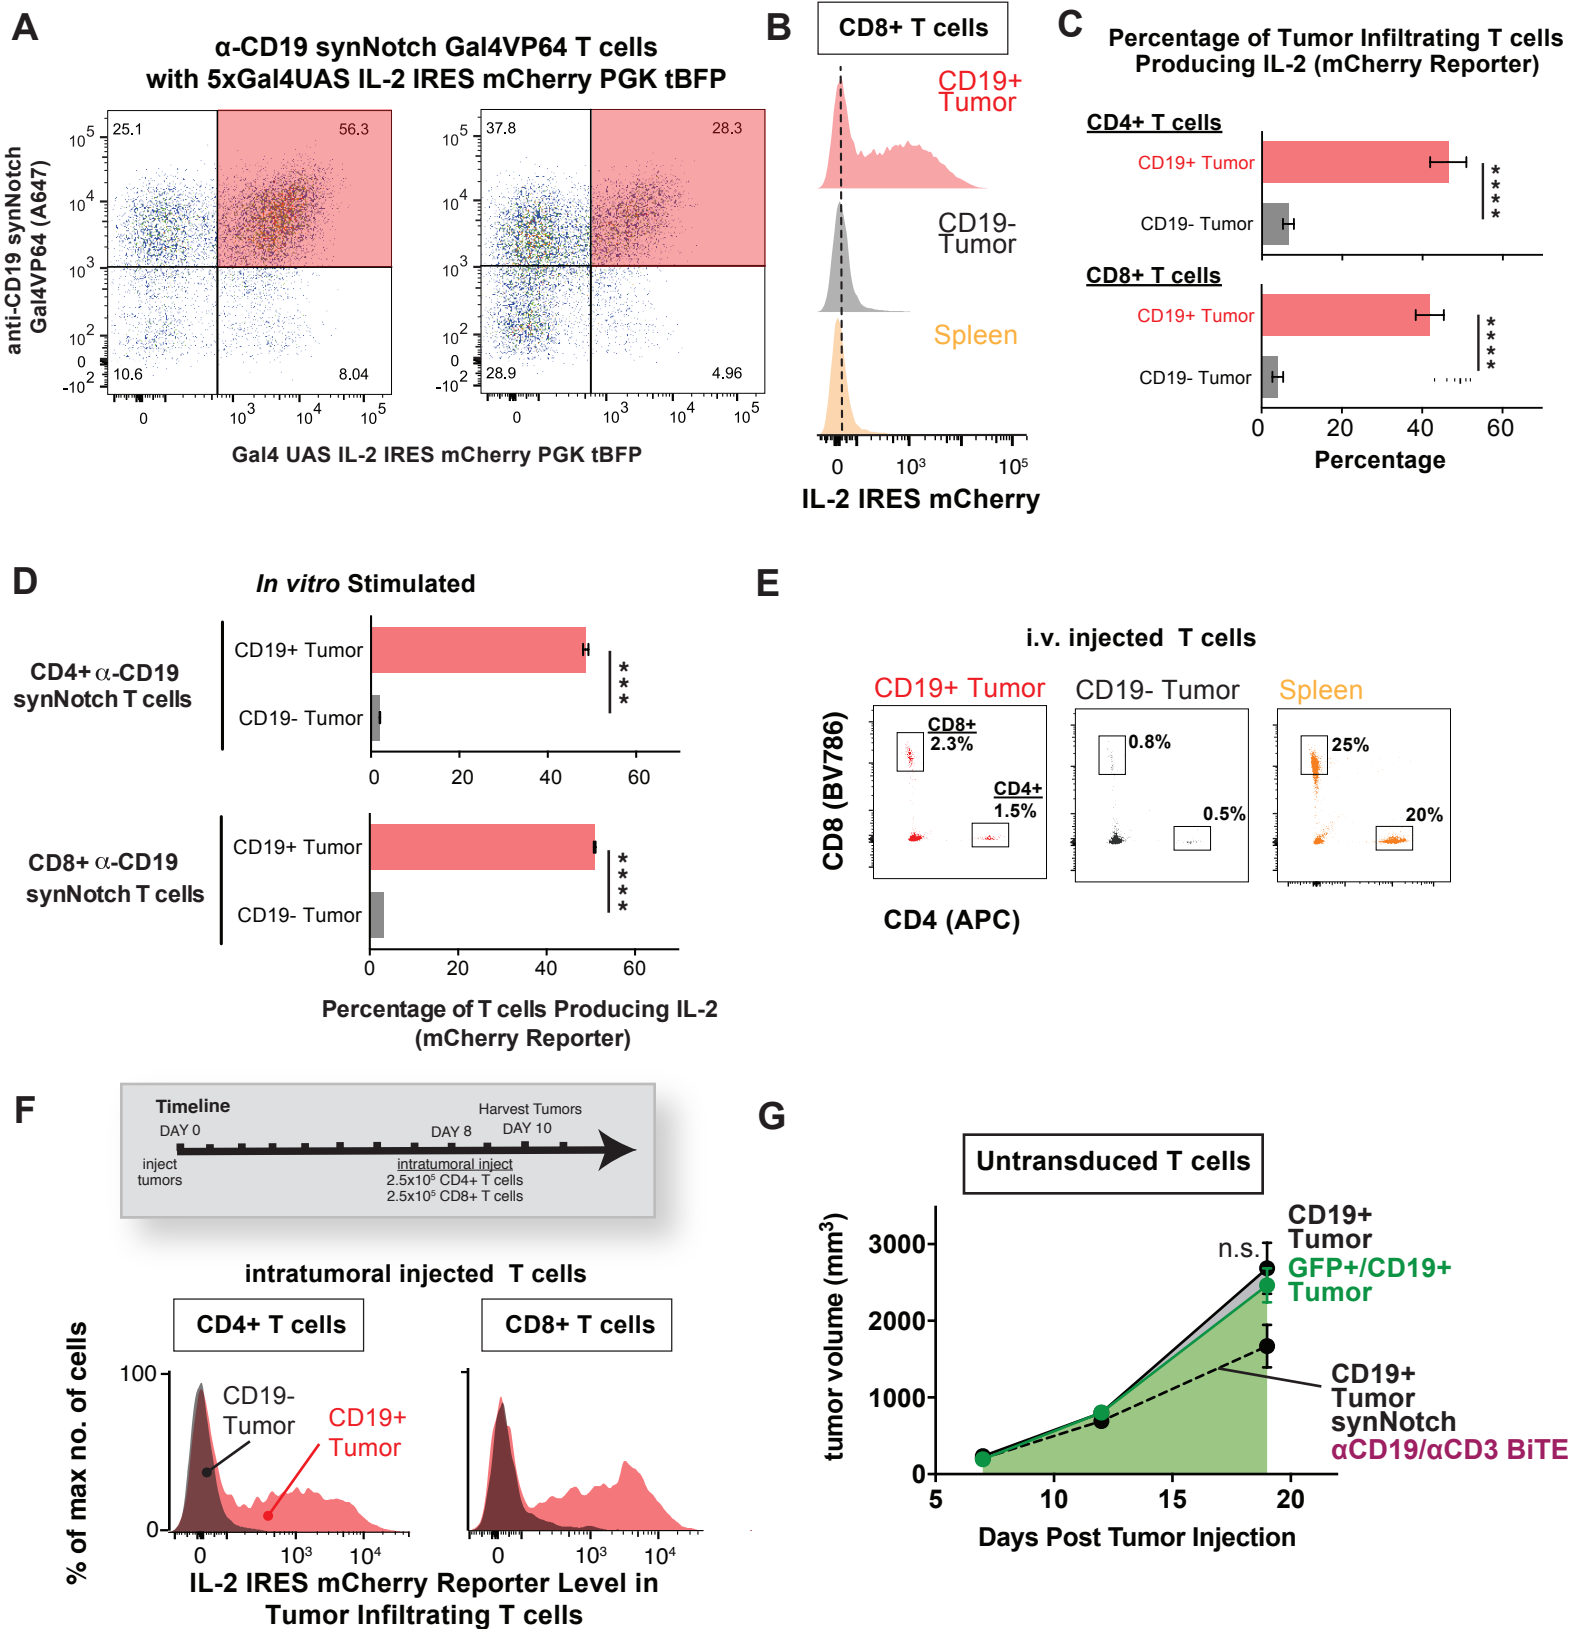

Supplement: NIHMS820006-supplement-7.pdf [file NIHMS820006-supplement-7.pdf]
