# Supplementary material
Source: PubMed Central journal article supplement (PMC5072533)

**Fig S2. synNotch Receptors Drive Customized Cytokine Profiles (related to main text Figure 2)**

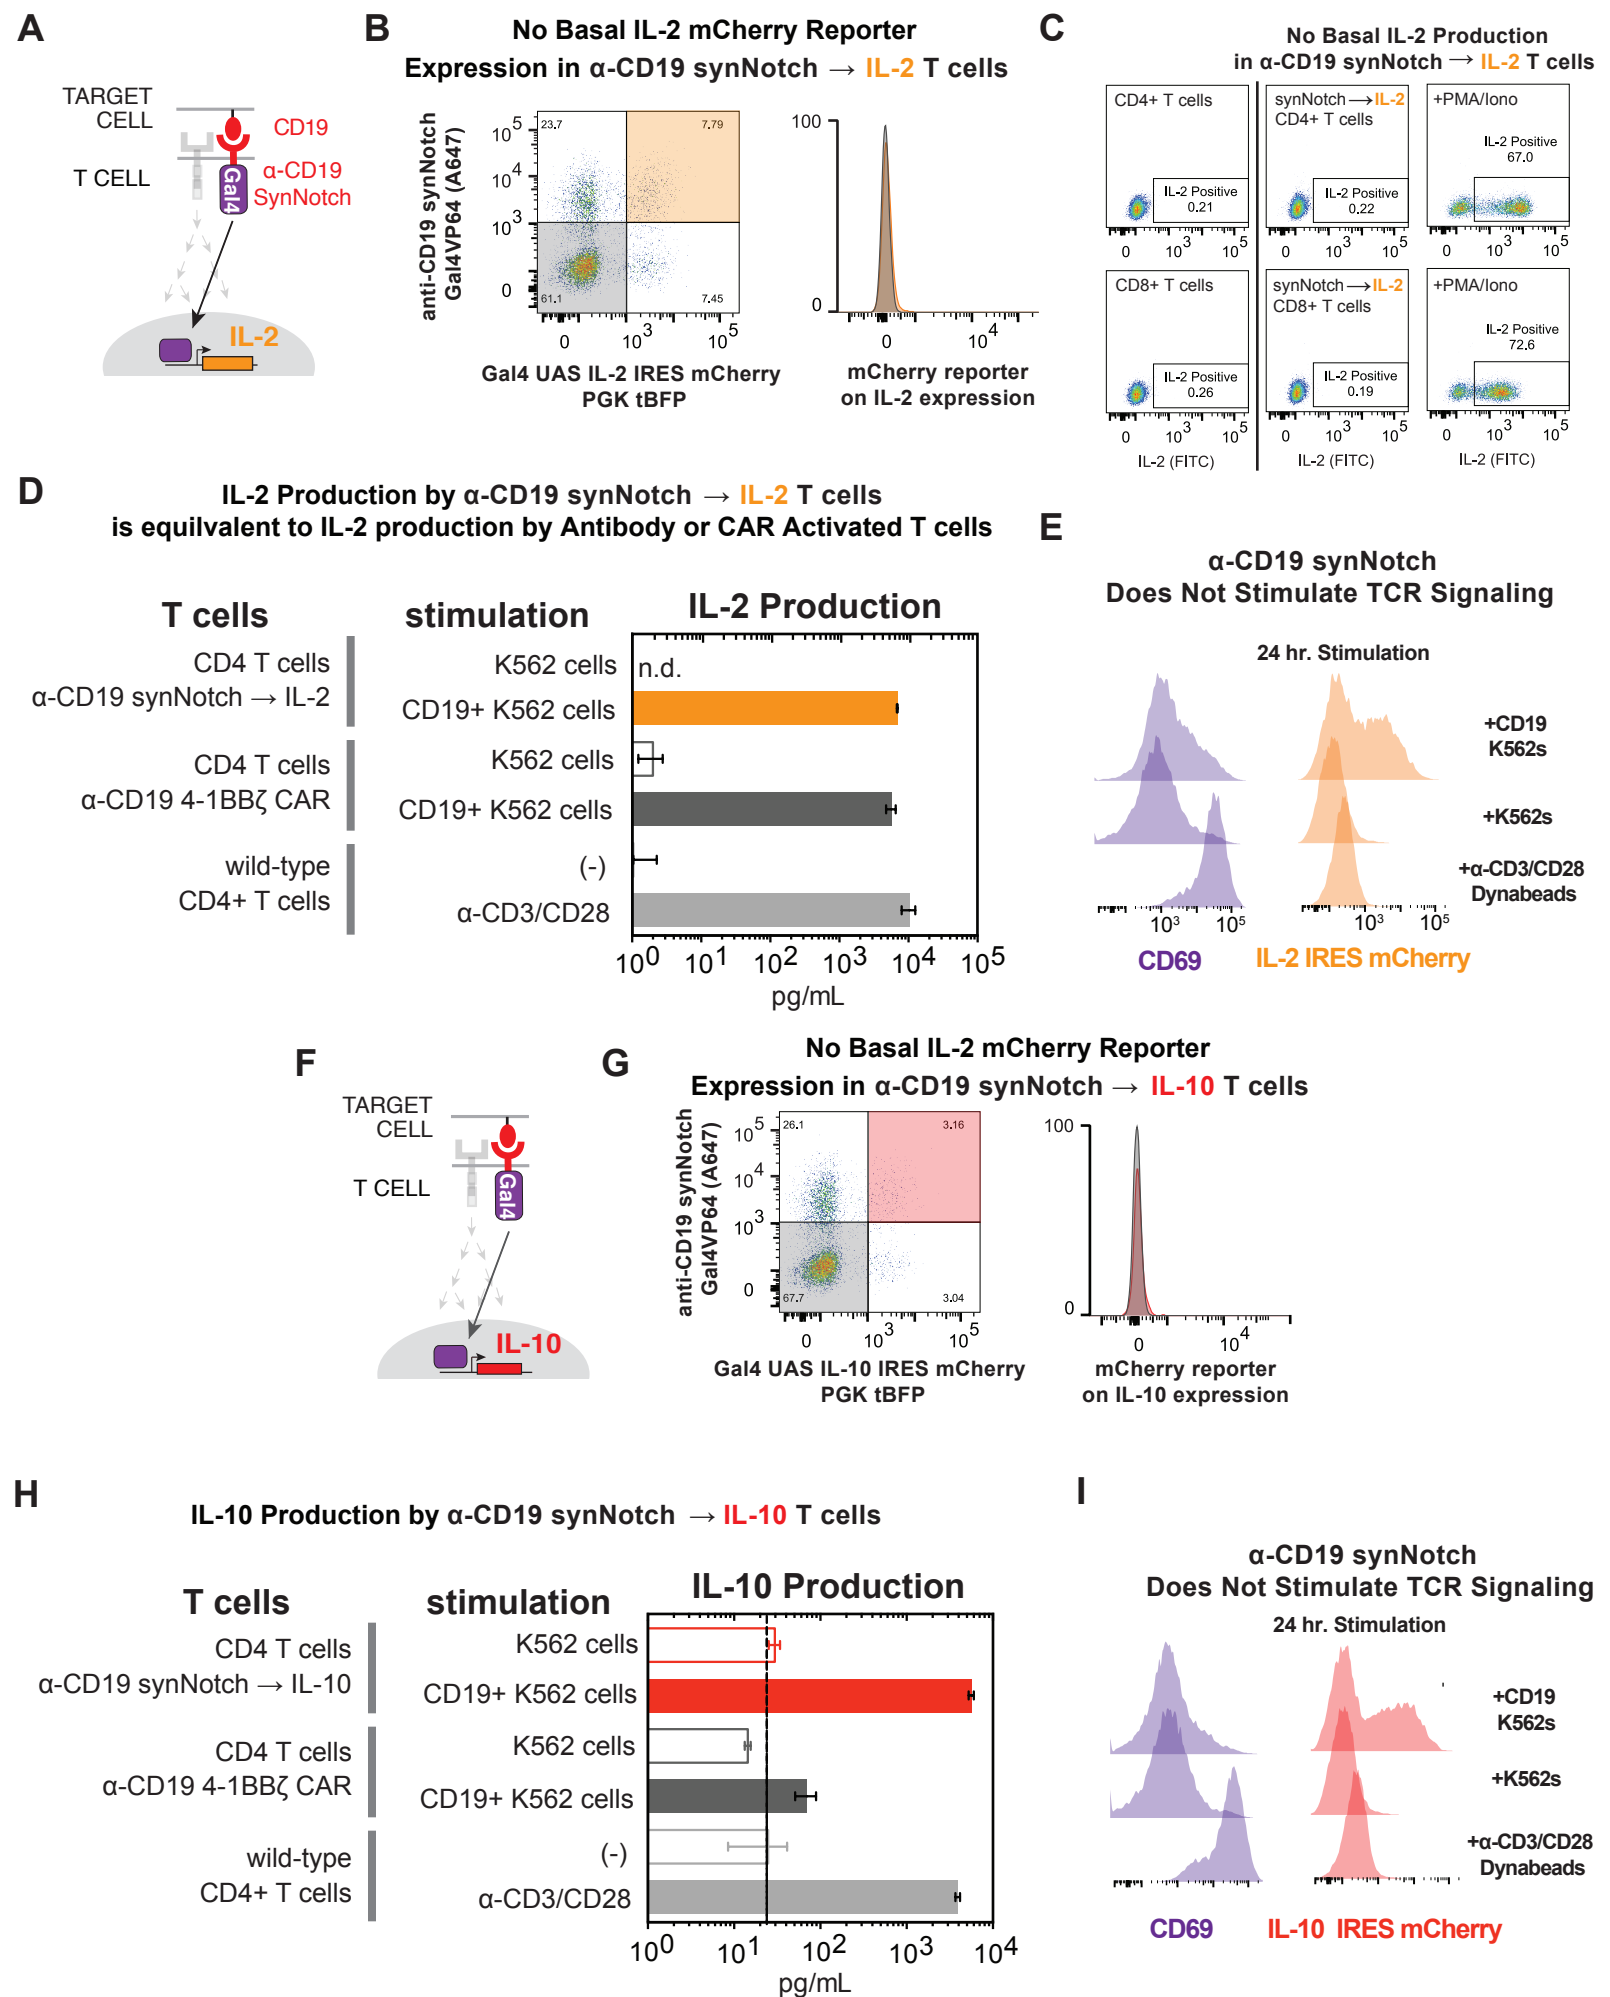

Supplement: NIHMS820006-supplement-3.pdf [file NIHMS820006-supplement-3.pdf]

**Fig S3. synNotch Receptor Circuits can Skew T cell Differentiation**  
(related to main text Figure 3).

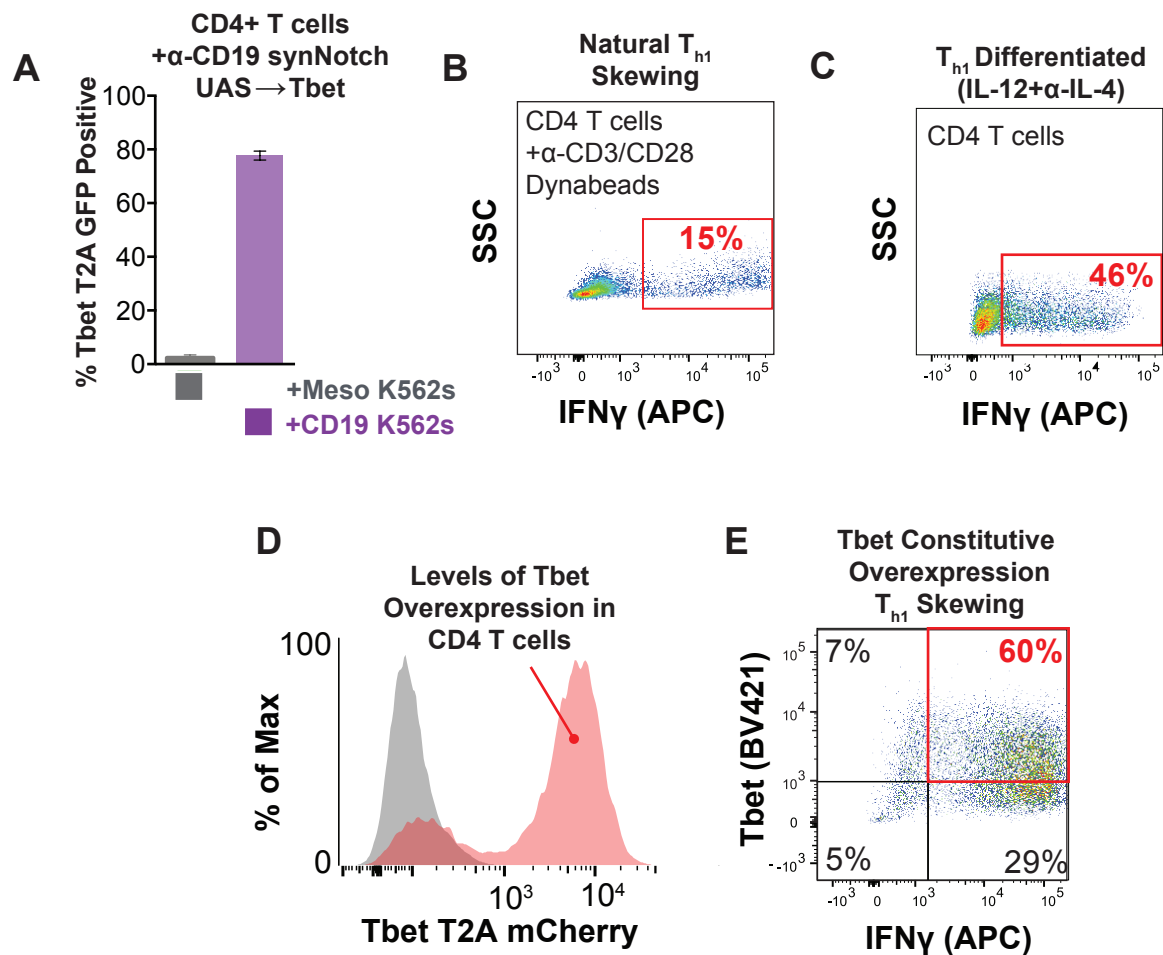

Supplement: NIHMS820006-supplement-4.pdf [file NIHMS820006-supplement-4.pdf]
